# Supplementary material for: Embedding a One-column Ocean Model (SIT 1.06) in the Community Atmosphere Model 5.3 (CAM5.3; CAM5–SIT v1.0) to Improve Madden–Julian Oscillation Simulation in Boreal Winter
Source: Copernicus journal article supplement (doi:10.5194/gmd-2021-346), 2021-11-22
Supplement: Supplementary file 1 [file gmd-2021-346-supplement-version1.pdf]

1 Supplementary Information

2

3 **Embedding a One-column Ocean Model (SIT 1.06) in the**  
4 **Community Atmosphere Model 5.3 (CAM5.3; CAM5–SIT**  
5 **v1.0) to Improve Madden–Julian Oscillation Simulation in**  
6 **Boreal Winter**

7

8 Yung-Yao Lan, Huang-Hsiung Hsu<sup>\*</sup>, Wan-Ling Tseng, and Li-Chiang Jiang

9

10 Research Center for Environmental Changes, Academia Sinica, Taipei 11529, Taiwan

11 *\*Correspondence to:* Huang-Hsiung Hsu (hhhsu@gate.sinica.edu.tw)

12

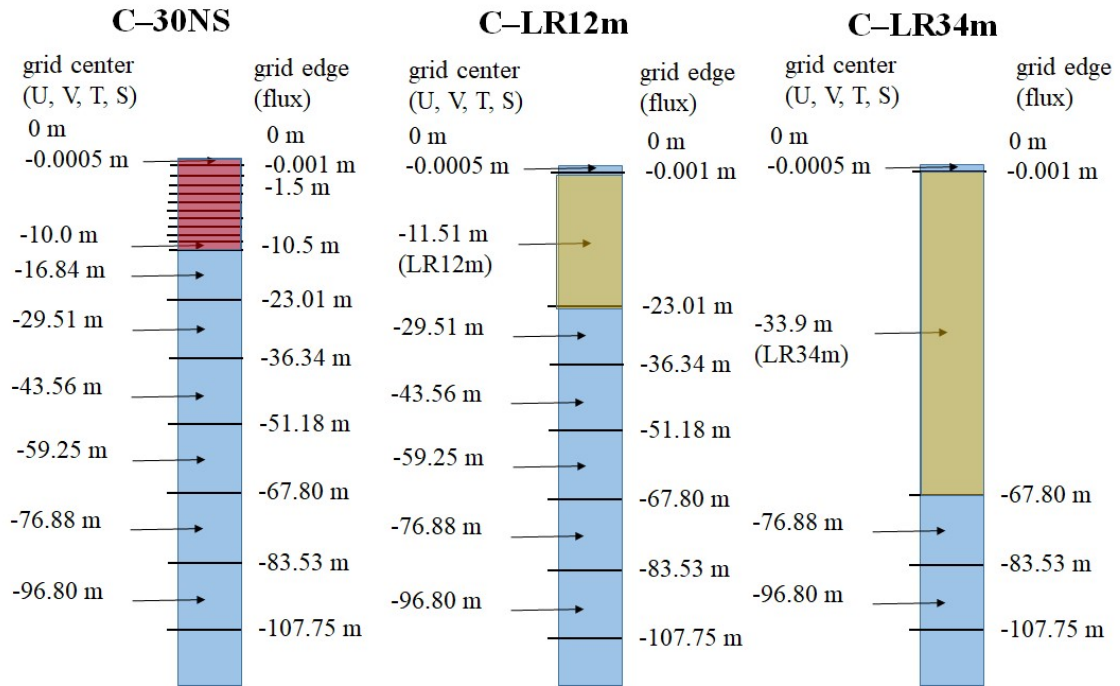

13

14

15 Figure S1. Diagram showing the vertical grid within 107.8 m in C-30NS, C-LR12m and  
 16 C-LR34m, the model is as thick as 107.8 meters and with several layers between surface  
 17 and model bottom. C-LR12m (31 vertical layers) and C-LR34m (28 vertical layers) have  
 18 a first layer with grid center of 12 m and 34 m, respectively, but have the same vertical  
 19 discretization as in the control experiment (C-30NS, 41 vertical layers) below the first  
 20 layer.
